# Supplementary material for: Discrete copper(i) chalcogenones with metal–metal interaction
Source: Royal Society of Chemistry journal article supplement (doi:10.1039/d4nj01758g), 2024-01-01
Supplement: d4nj01758g1.pdf [file d4nj01758g1.pdf]

## Supporting Information

| <b>Fig/Table</b> | <b>Table of Contents</b>                                                                                                                                                                                                                                                                             | <b>Page. No</b> |
|------------------|------------------------------------------------------------------------------------------------------------------------------------------------------------------------------------------------------------------------------------------------------------------------------------------------------|-----------------|
| <b>Fig. S1.</b>  | <sup>1</sup> H NMR spectrum of <b>1</b> in DMSO- <i>d</i> <sub>6</sub> at 25 °C.                                                                                                                                                                                                                     | 3               |
| <b>Fig. S2.</b>  | <sup>13</sup> C NMR spectrum of <b>1</b> in DMSO- <i>d</i> <sub>6</sub> at 25 °C.                                                                                                                                                                                                                    | 4               |
| <b>Fig. S3.</b>  | <sup>1</sup> H NMR spectrum of <b>2</b> in DMSO- <i>d</i> <sub>6</sub> at 25 °C.                                                                                                                                                                                                                     | 4               |
| <b>Fig. S4.</b>  | <sup>13</sup> C NMR spectrum of <b>2</b> in DMSO- <i>d</i> <sub>6</sub> at 25 °C.                                                                                                                                                                                                                    | 5               |
| <b>Fig. S5.</b>  | <sup>1</sup> H NMR spectrum of <b>3</b> in DMSO- <i>d</i> <sub>6</sub> at 25 °C                                                                                                                                                                                                                      | 5               |
| <b>Fig. S6.</b>  | FT-IR spectrum of <b>1</b> at 25 °C (KBr method).                                                                                                                                                                                                                                                    | 6               |
| <b>Fig. S7.</b>  | FT-IR spectrum of <b>2</b> at 25 °C (neat).                                                                                                                                                                                                                                                          | 6               |
| <b>Fig. S8.</b>  | FT-IR spectrum of <b>3</b> at 25 °C (neat).                                                                                                                                                                                                                                                          | 7               |
| <b>Fig. S9.</b>  | Powder XRD data analysis of <b>1-3</b> at 25 °C.                                                                                                                                                                                                                                                     | 8               |
| <b>Fig S10.</b>  | Raman spectra of <b>1-3</b> .                                                                                                                                                                                                                                                                        | 9               |
| <b>Fig S11.</b>  | UV-vis spectra of <b>1-3</b> . ( $1 \times 10^{-6}$ M THF).                                                                                                                                                                                                                                          | 10              |
| <b>Fig S12.</b>  | Solution state emission spectra of <b>1-3</b> . Dash line-Ex spectra.<br>Solid line-Em spectra ( $1 \times 10^{-6}$ M THF). See Table S4.                                                                                                                                                            | 11              |
| <b>Fig S13.</b>  | Solid state emission spectra of <b>1-3</b> . Dash line-Ex spectra. Solid<br>line-Em spectra (Crystalline state). See Table S4.                                                                                                                                                                       | 12              |
| <b>Fig. S14.</b> | Hydrogen-optimised truncated models of complex highlighting<br>the two LCu/LCuSe fragments of complexes <b>1(a)</b> , <b>2 (b)</b> , <b>3 (c)</b> .                                                                                                                                                  | 12              |
| <b>Fig. S15.</b> | DFT computed potential energy scan (PES) surface for the<br>formation of complex <b>1</b> from its two fragments LCuI-LCuI.<br>Colour code grey(carbon); red(oxygen); blue(nitrogen);<br>violet(iodine); hydrogen(white); cyan(copper); yellow(sulphur).                                             | 13              |
| <b>Fig. S16.</b> | NBO computed Second order perturbation donor-acceptor<br>interaction representing the strength of the Cu-Cu( $d^{10}$ - $d^{10}$ )<br>interaction in complex <b>1</b> . Colour code: grey(carbon);<br>red(oxygen); blue(nitrogen); violet(iodine); hydrogen(white);<br>cyan(copper); yellow(sulphur) | 14              |

|                  |                                                                                                                                                                                                                                                                                                 |    |
|------------------|-------------------------------------------------------------------------------------------------------------------------------------------------------------------------------------------------------------------------------------------------------------------------------------------------|----|
| <b>Fig. S17.</b> | NBO computed Second order perturbation donor-acceptor interaction representing the strength of the Cu-Cu(d <sup>10</sup> -d <sup>10</sup> ) interaction in complex <b>2</b> . Color code: grey(carbon);red(oxygen);blue(nitrogen);violet(iodine);hydrogen(white);cyan(copper);brown(selenium).  | 14 |
| <b>Fig. S18.</b> | NBO computed Second order perturbation donor-acceptor interaction representing the strength of the Cu-Cu(d <sup>10</sup> -d <sup>10</sup> ) interaction in complex <b>3</b> . Colour code: grey(carbon);red(oxygen);blue(nitrogen);violet(iodine);hydrogen(white);cyan(copper);brown(selenium). | 15 |
| <b>Fig. S19.</b> | Plots of deformation densities $\Delta\rho_n$ and the orbital stabilization energies $\Delta E$ of complex <b>1</b> . The isosurface value for deformation densities is 0.0003. The direction of the deformation density plot is from red to blue                                               | 16 |
| <b>Fig. S20.</b> | Plots of deformation densities $\Delta\rho_n$ and the orbital stabilization energies $\Delta E$ of complex <b>2</b> . The isosurface value for deformation densities is 0.0003. The direction of the deformation density plot is from red to blue.                                              | 17 |
| <b>Fig. S21.</b> | Plots of deformation densities $\Delta\rho_n$ and the orbital stabilization energies $\Delta E$ of complex <b>3</b> . The isosurface value for deformation densities is 0.0003. The direction of the deformation density plot is from red to blue.                                              | 18 |
| <b>Fig. S22.</b> | a) Atomic orbitals corresponding to the Cu orbitals in complex <b>1</b> . b) Molecular energy level diagram for complex <b>1</b> . c) Molecular orbitals corresponding to the Cu-Cu interactions of Cu AO'                                                                                      | 19 |
| <b>Fig. S23.</b> | Reduced density gradient (RDG) analysis for complexes <b>1(a)</b> , <b>2(b)</b> , <b>3(c)</b> .                                                                                                                                                                                                 | 20 |
| <b>Fig. S24.</b> | Energy levels of ten high-lying occupied orbitals and MOs for three types of bonding orbitals.                                                                                                                                                                                                  | 21 |

|                  |                                                                                                      |    |
|------------------|------------------------------------------------------------------------------------------------------|----|
| <b>Table S1.</b> | The structural parameters of compounds <b>1-3</b>                                                    | 22 |
| <b>Table S2.</b> | Selected bond lengths of <b>1-3</b>                                                                  | 23 |
| <b>Table S3.</b> | Selected bond angles of <b>1-3</b>                                                                   | 24 |
| <b>Table S4</b>  | Photophysical properties of <b>1-3</b>                                                               | 24 |
| <b>Table S5.</b> | Continuous Shape Measurement (CShM) for Cu(I) sites in<br>Cu(I)-NHCh complexes <b>1</b> and <b>2</b> | 25 |
| <b>Table S6.</b> | Continuous Shape Measurement (CShM) for Cu(I) sites in<br>Cu(I)-NHCh complex <b>3</b>                | 25 |

---



---

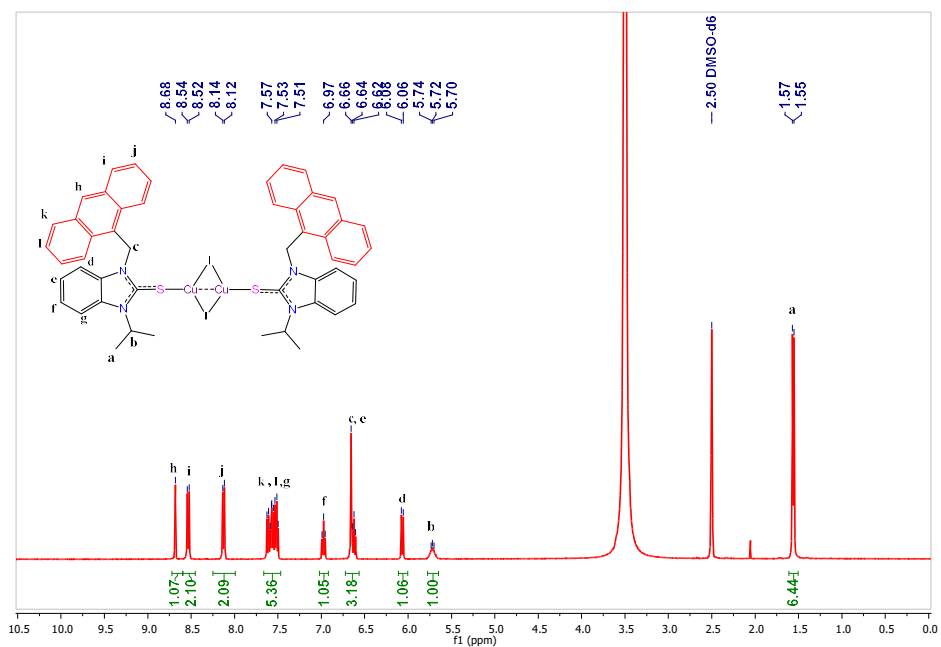

**Fig. S1.** <sup>1</sup>H NMR spectrum of **1** in DMSO-*d*<sub>6</sub> at 25 °C.

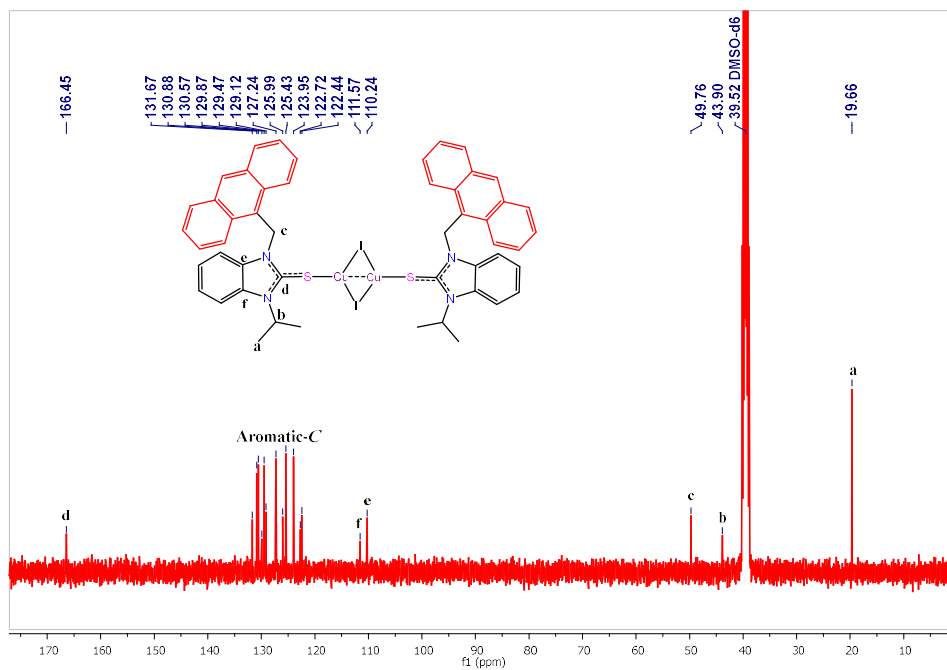

**Fig. S2.** <sup>13</sup>C NMR spectrum of **1** in DMSO-*d*<sub>6</sub> at 25 °C.

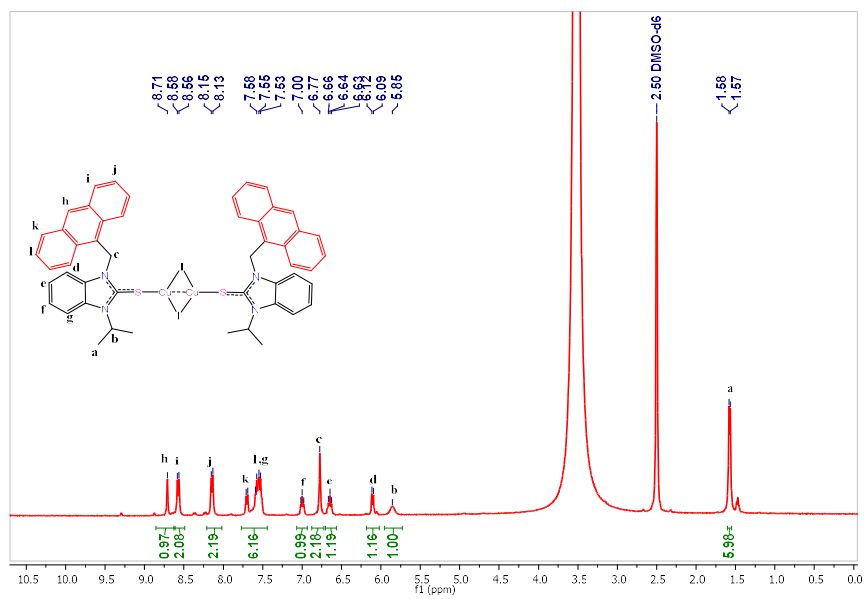

**Fig. S3.** <sup>1</sup>H NMR spectrum of **2** in DMSO-*d*<sub>6</sub> at 25 °C.

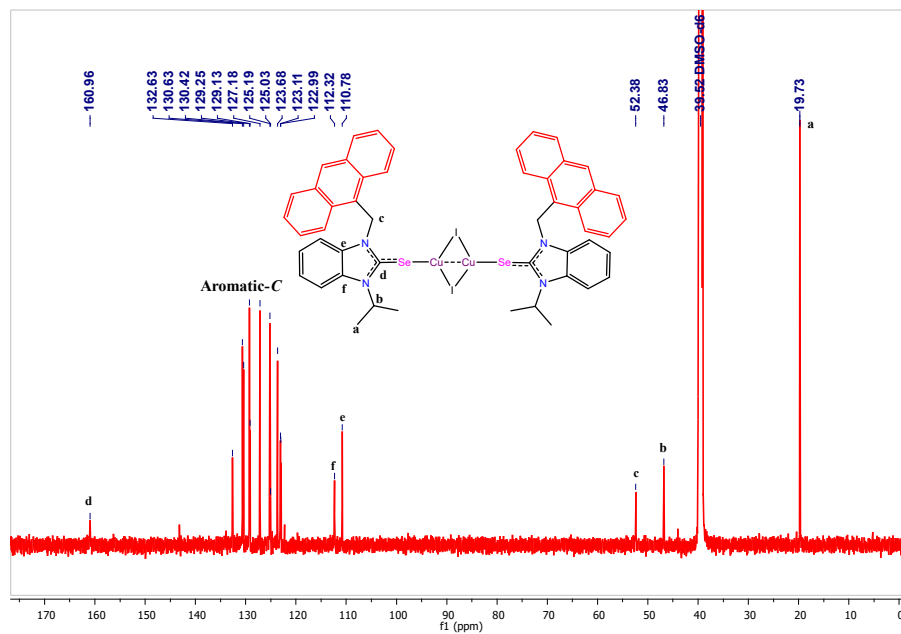

**Fig. S4.**  $^{13}\text{C}$  NMR spectrum of **2** in  $\text{DMSO-}d_6$  at  $25\text{ }^\circ\text{C}$ .

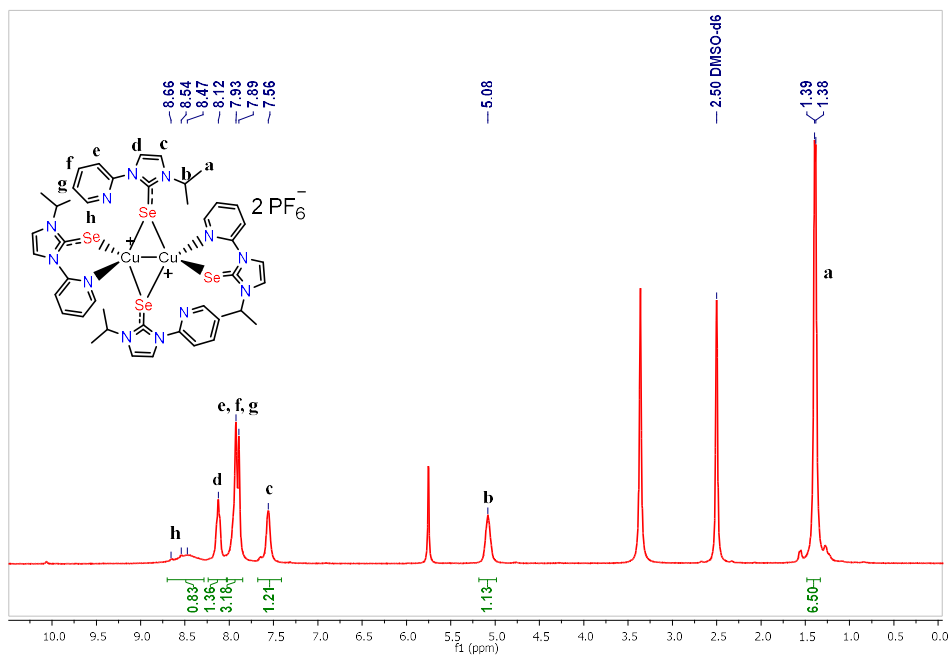

**Fig. S5.**  $^1\text{H}$  NMR spectrum of **3** in  $\text{DMSO-}d_6$  at  $25\text{ }^\circ\text{C}$ .

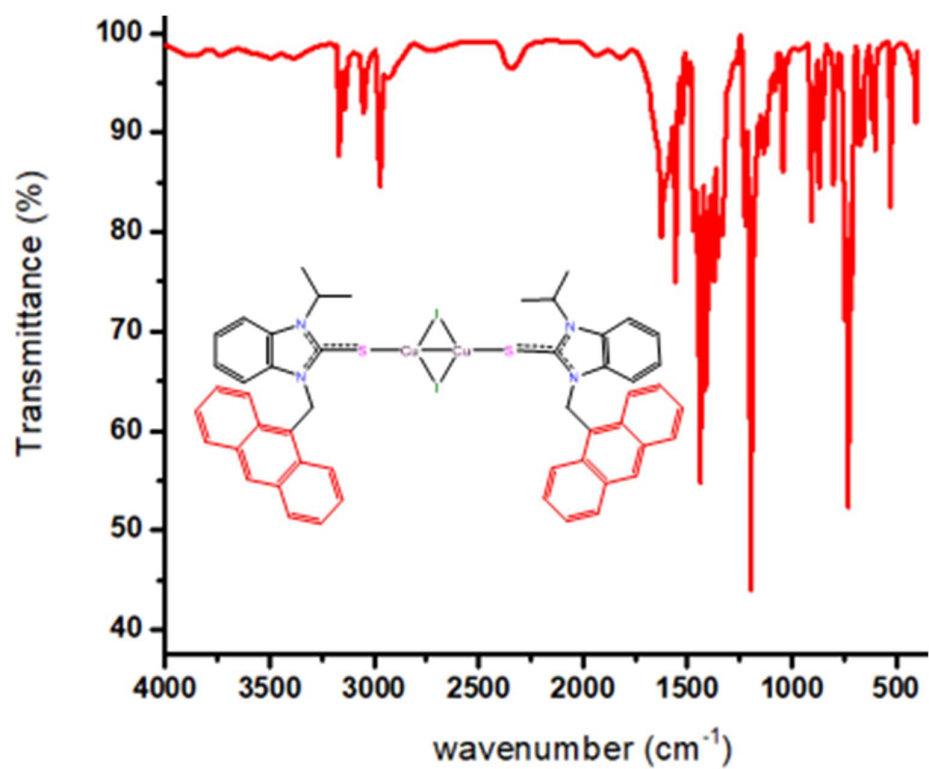

Fig. S6. FT-IR spectrum of 1 at 25 °C (KBr method).

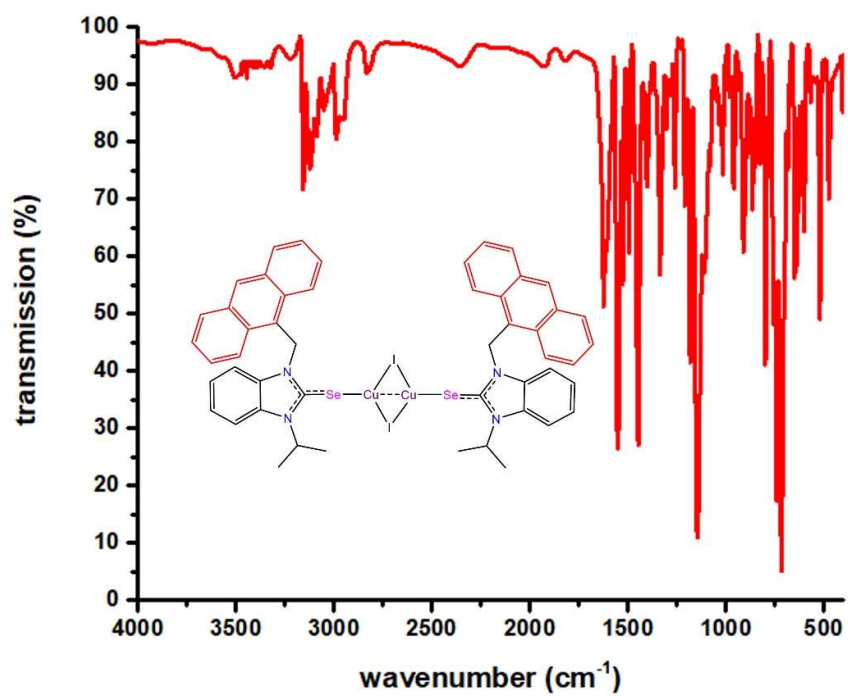

Fig. S7. FT-IR spectrum of 2 at 25 °C (neat).

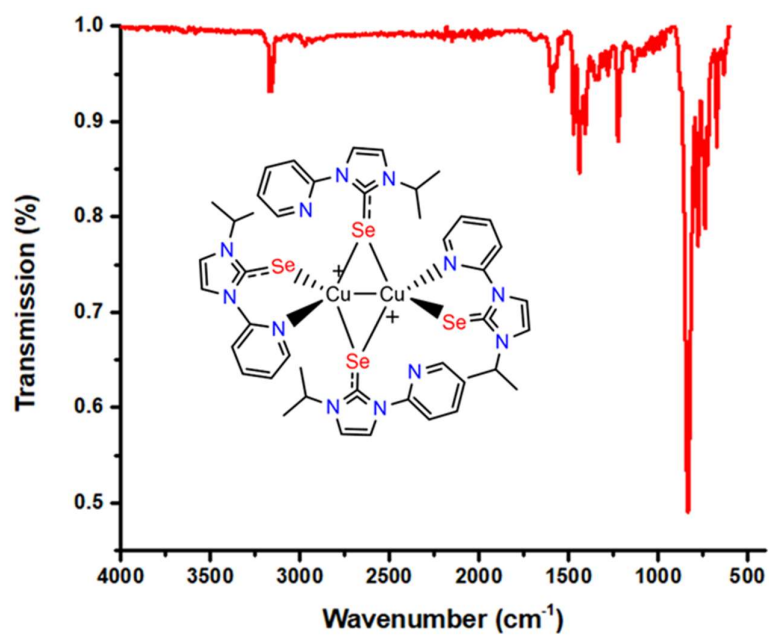

**Fig. S8.** FT-IR spectrum of **3** at 25 °C (neat).

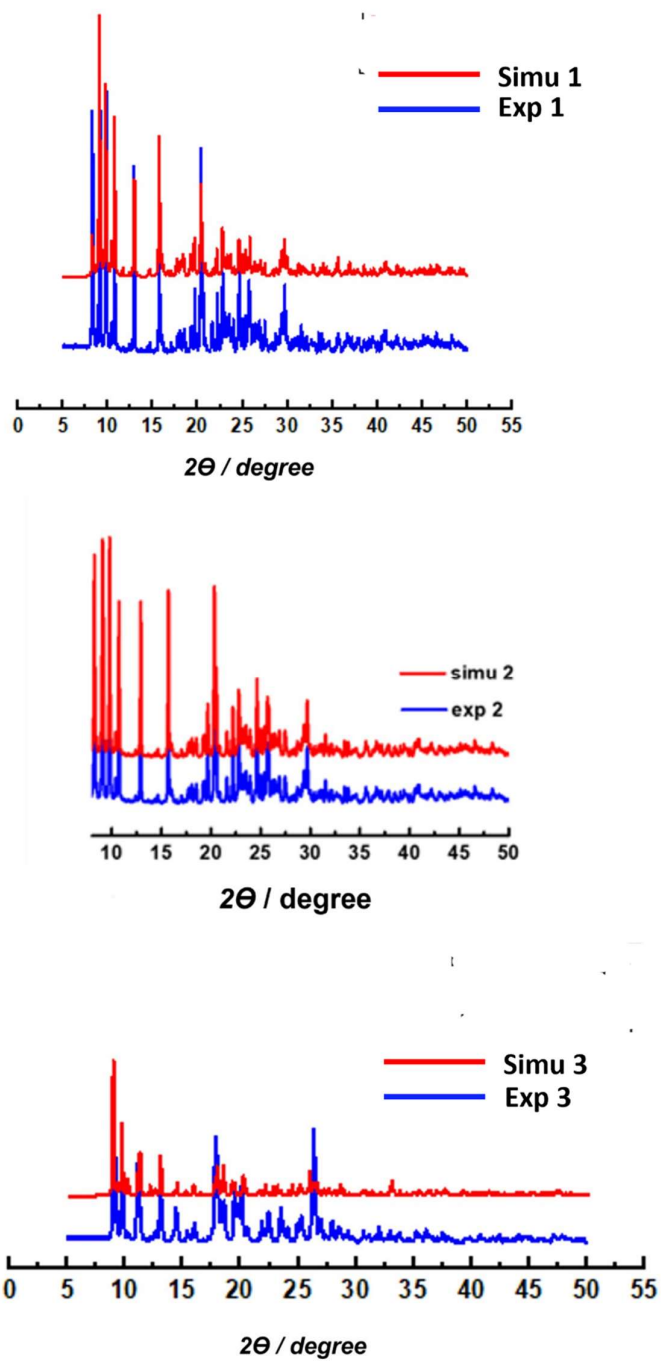

Fig. S9. Powder XRD data analysis of 1-3.



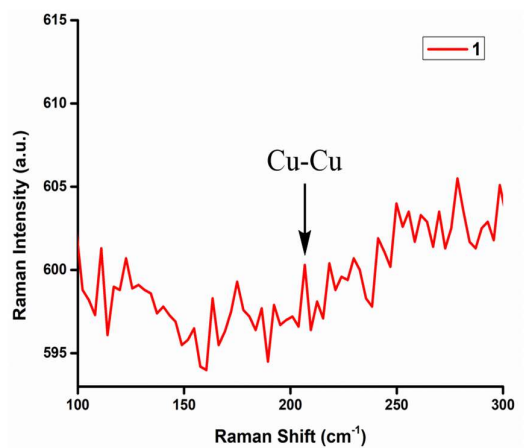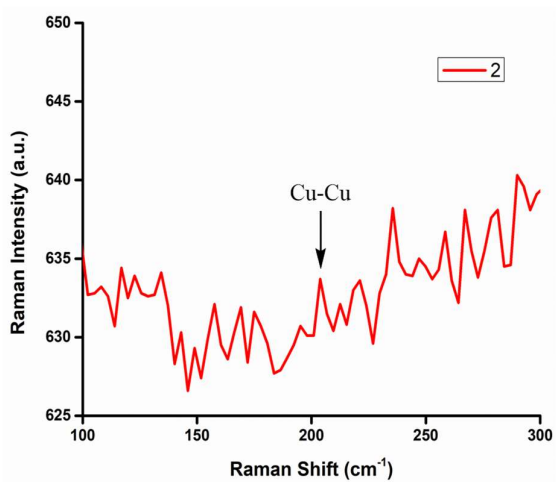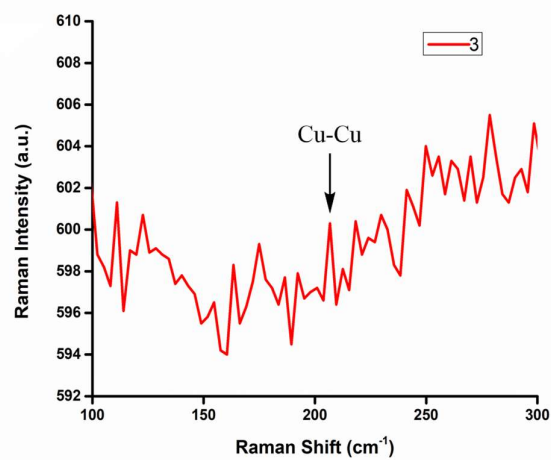

**Fig. S10.** Raman spectra of 1-3.

We have characterised 1-3 using the Raman spectroscopy and reported the spectra in the range 100-300 cm<sup>-1</sup>. We observed the weak signals for our samples. Unfortunately, the samples are unstable under high laser power to get better signals to noise ratio. Moreover, the copper(I)-

copper(I) interaction is known to give very weak signal at  $206\text{ cm}^{-1}$  (Ref. N. V. S. Harisomayajula, B.H. Wu, D.Y. Lu, T.-S. Kuo, I.C. Chen, Y.C. Tsai, *Angew. Chem. Int. Ed.* 2018, **57**, 9925-9932). By considering the sample stability under the laser power, we have collected the Raman data. We got the Cu-Cu bond at  $206\text{ cm}^{-1}$ , which is comparable with literature Cu-Cu bond at  $204\text{ cm}^{-1}$ .

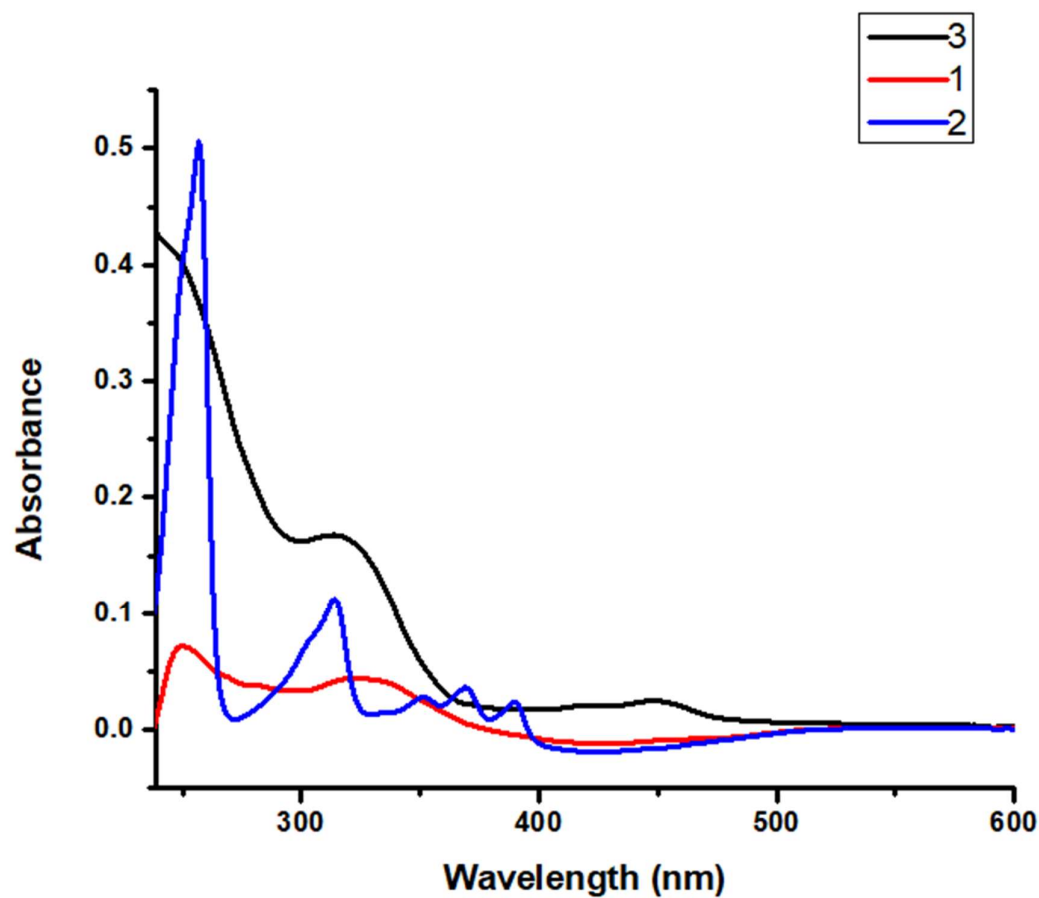

**Fig. S11.** UV-vis spectra of 1-3. ( $1 \times 10^{-6}\text{ M}$  THF).

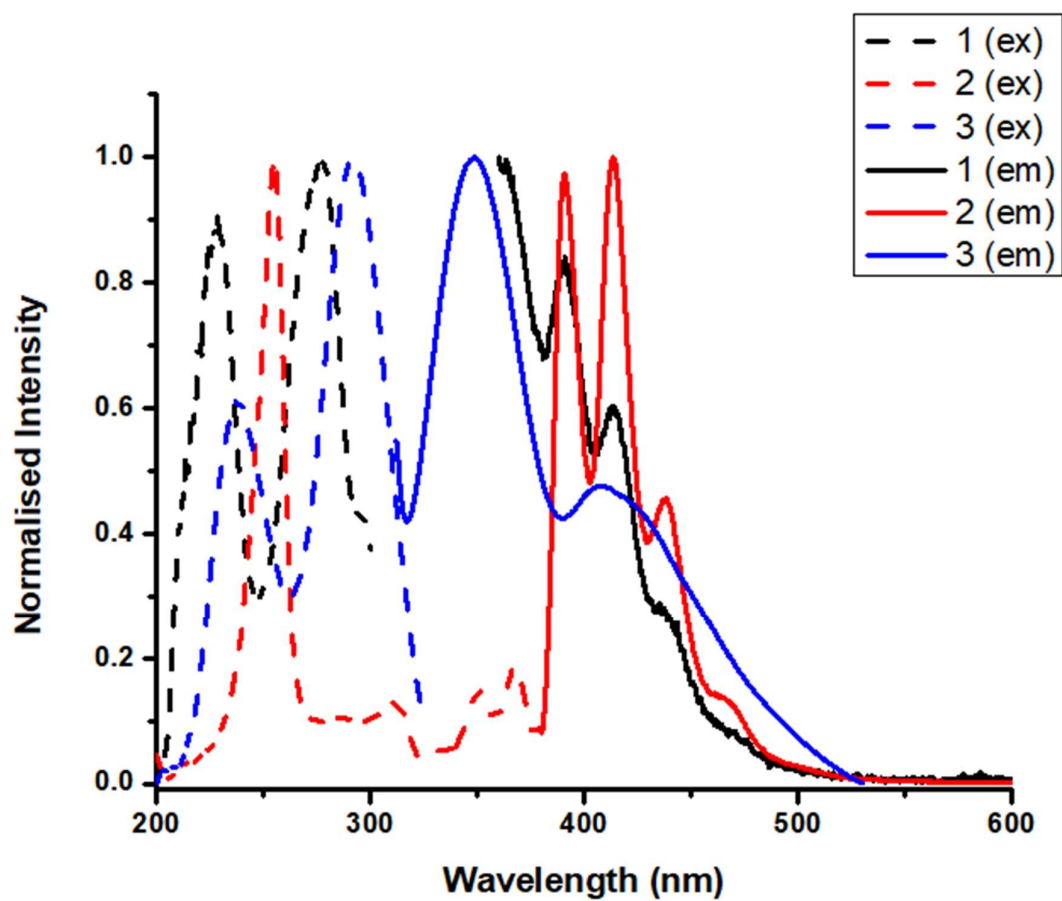

**Fig. S12.** Emission spectra of **1-3** in solution state. Dash line-Ex spectra. Solid line-Em spectra ( $1 \times 10^{-6}$  M THF). See Table S4.

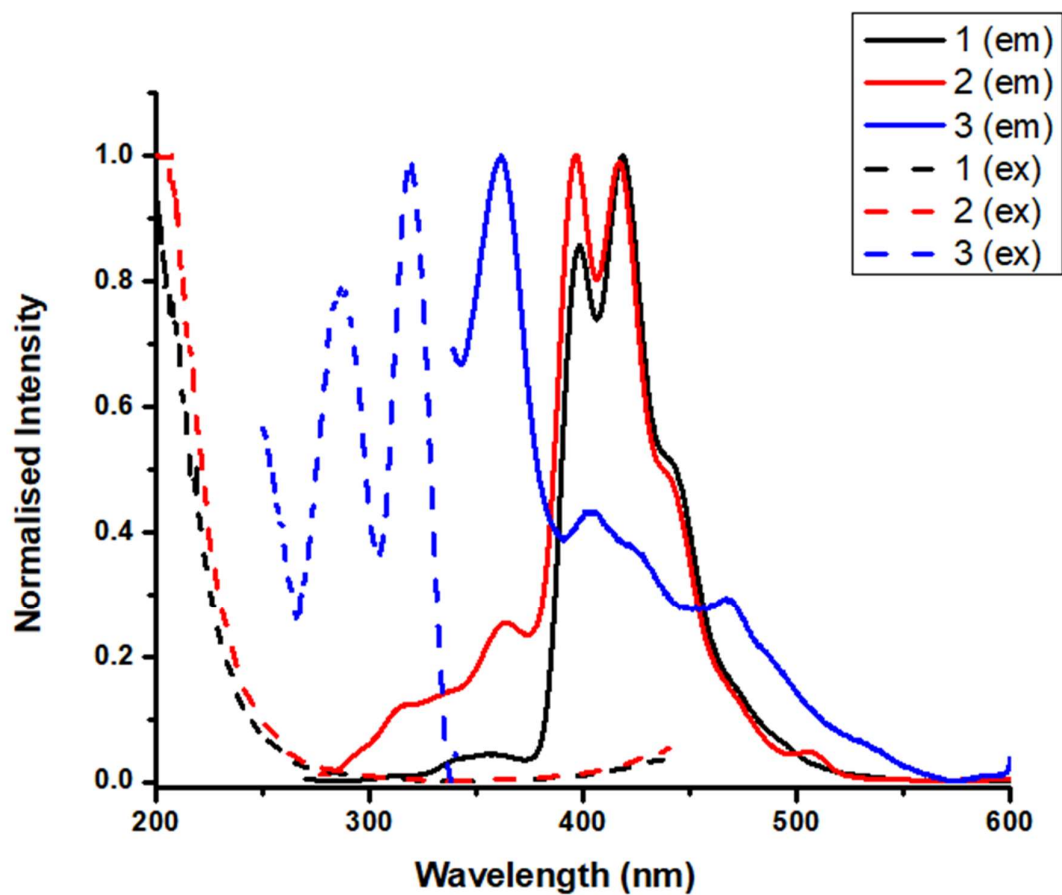

Fig. S13. Emission spectra of 1-3 in solid state. Dash line-Ex spectra. Solid line-Em spectra (Crystalline state). See Table S4.

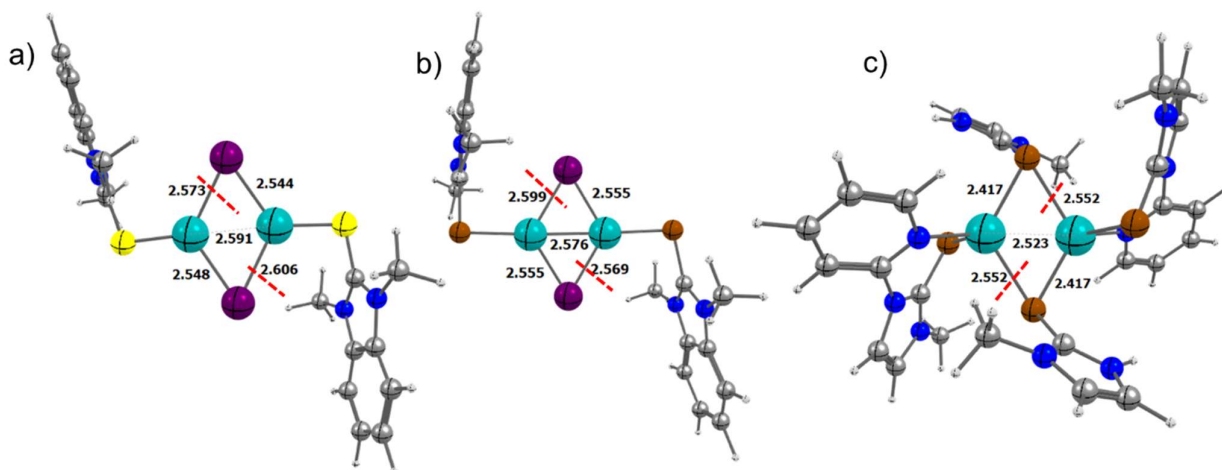

Fig. S14. Hydrogen-optimised truncated models of complex highlighting the two LCu/LCuSe fragments of complexes 1 (a), 2 (b), 3 (c).

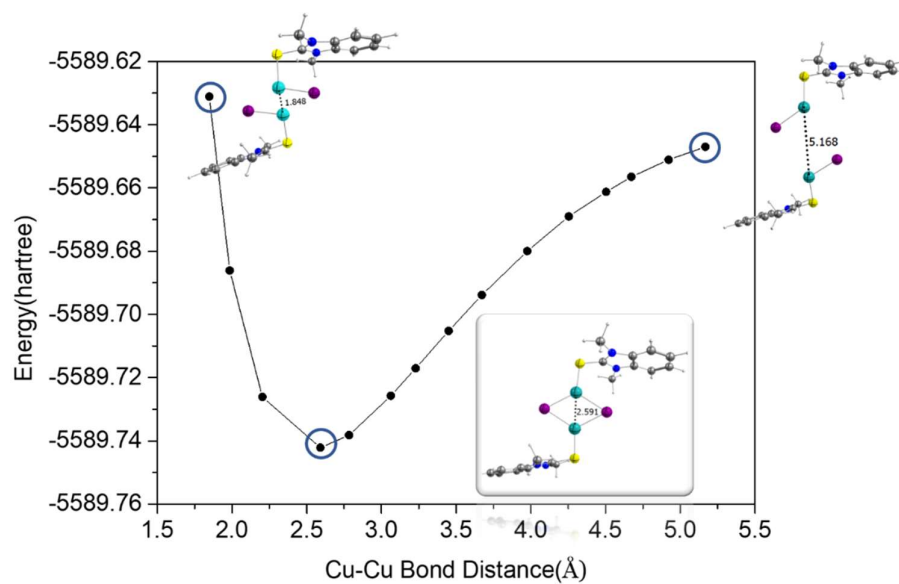

**Fig. S15.** DFT computed potential energy scan (PES) surface by scanning Cu...Cu bond distance in **1**. Colour code: grey (carbon); red (oxygen); blue (nitrogen); violet (iodine); hydrogen (white); cyan (copper); yellow (sulphur).

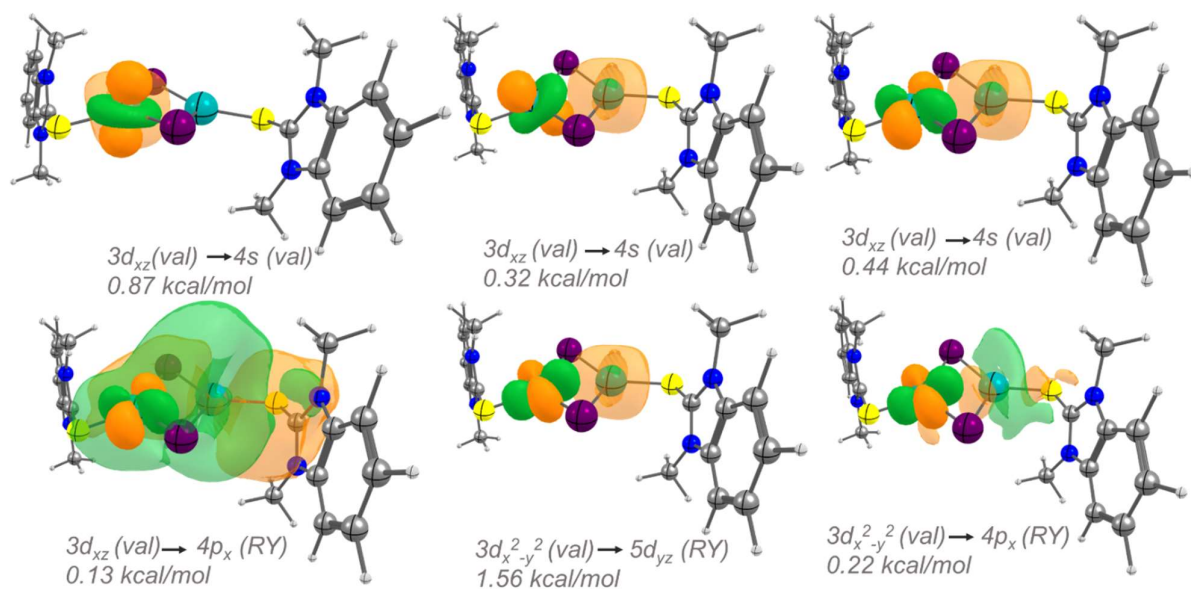

**Fig. S16.** NBO computed Second-order perturbation donor-acceptor interaction representing the strength of the Cu-Cu ( $d^{10}$ - $d^{10}$ ) interaction in complex **1**. Colour code: grey (carbon); red (oxygen); blue (nitrogen); violet (iodine); hydrogen (white); cyan (copper); yellow (sulphur).

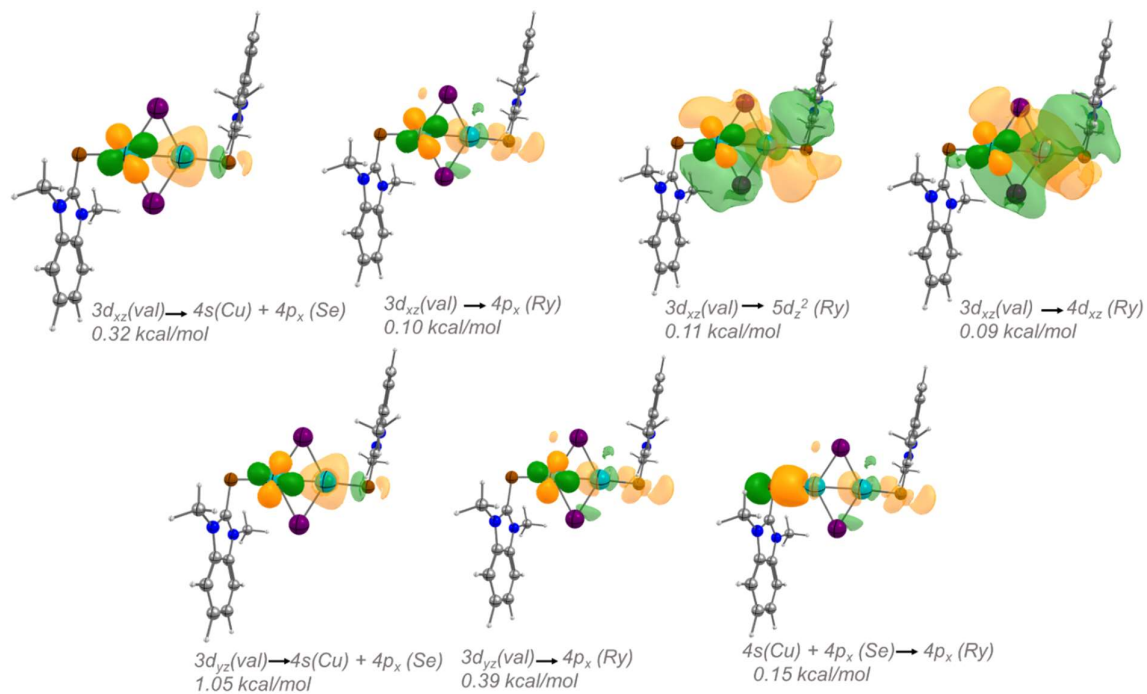

**Fig. S17.** NBO computed Second order perturbation donor acceptor interaction representing the strength of the Cu-Cu ( $d^{10}$ - $d^{10}$ ) interaction in complex **2**. Colour code: grey (carbon); red (oxygen); blue (nitrogen);violet (iodine);hydrogen (white);cyan (copper);brown (selenium).

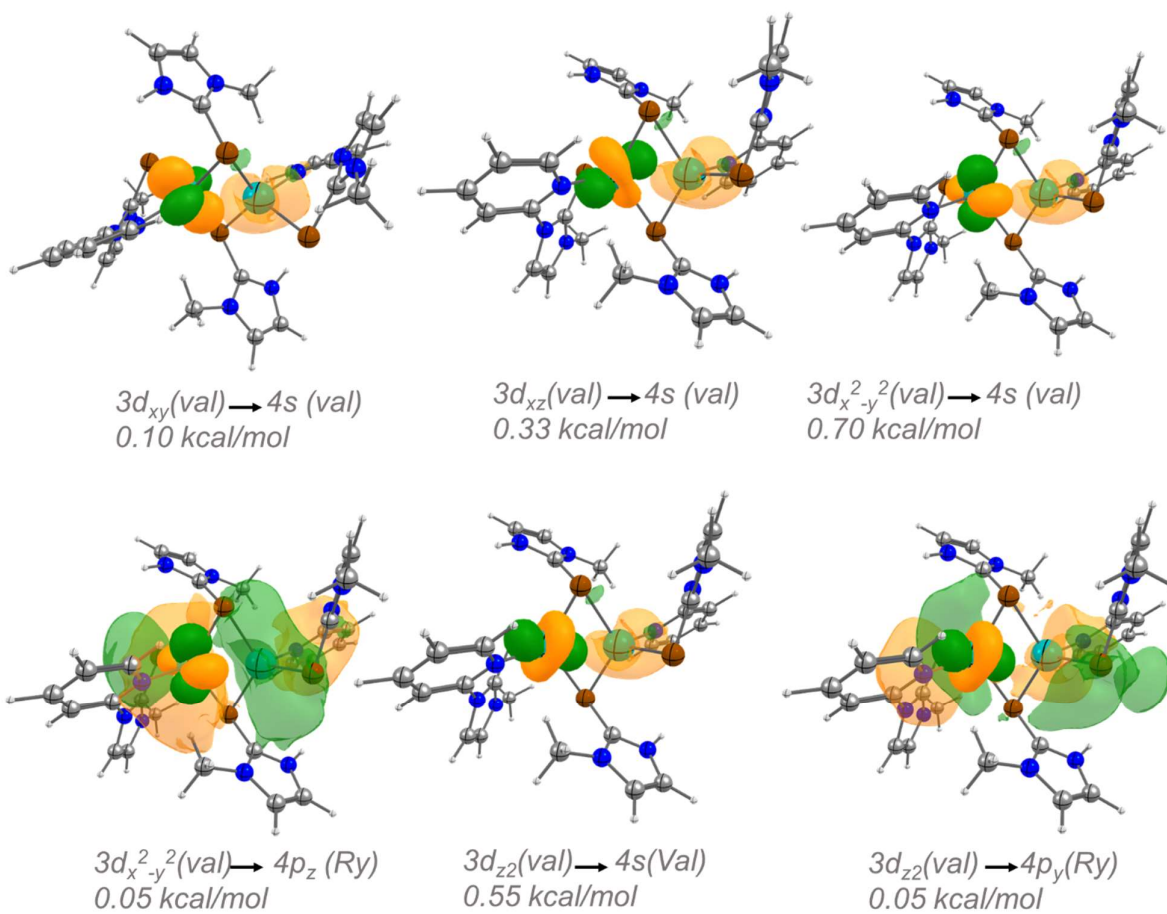

**Fig. S18.** NBO computed Second order perturbation donor acceptor interaction representing the strength of the Cu-Cu( $d^{10}$ - $d^{10}$ ) interaction in complex **3**. Colour code: grey(carbon); red(oxygen);blue(nitrogen);violet(iodine);hydrogen(white);cyan(copper);brown(selenium).



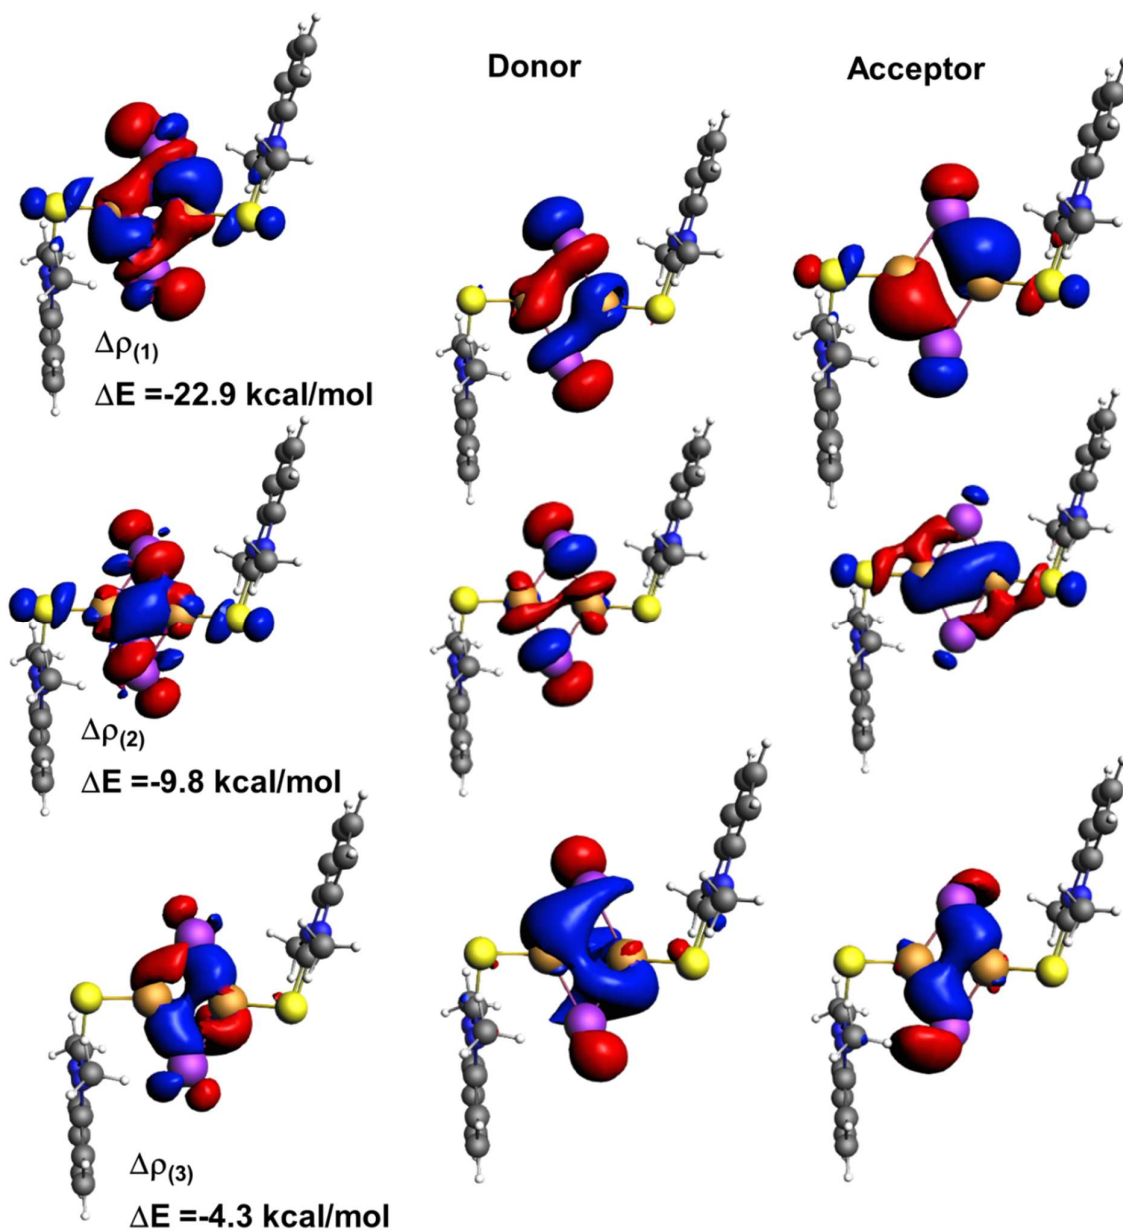

**Fig. S19.** Plots of deformation densities  $\Delta\rho_n$  and the orbital stabilization energies  $\Delta E$  of complex **1**. The isosurface value for deformation densities is 0.0003. The direction of the deformation density plot is from red to blue.

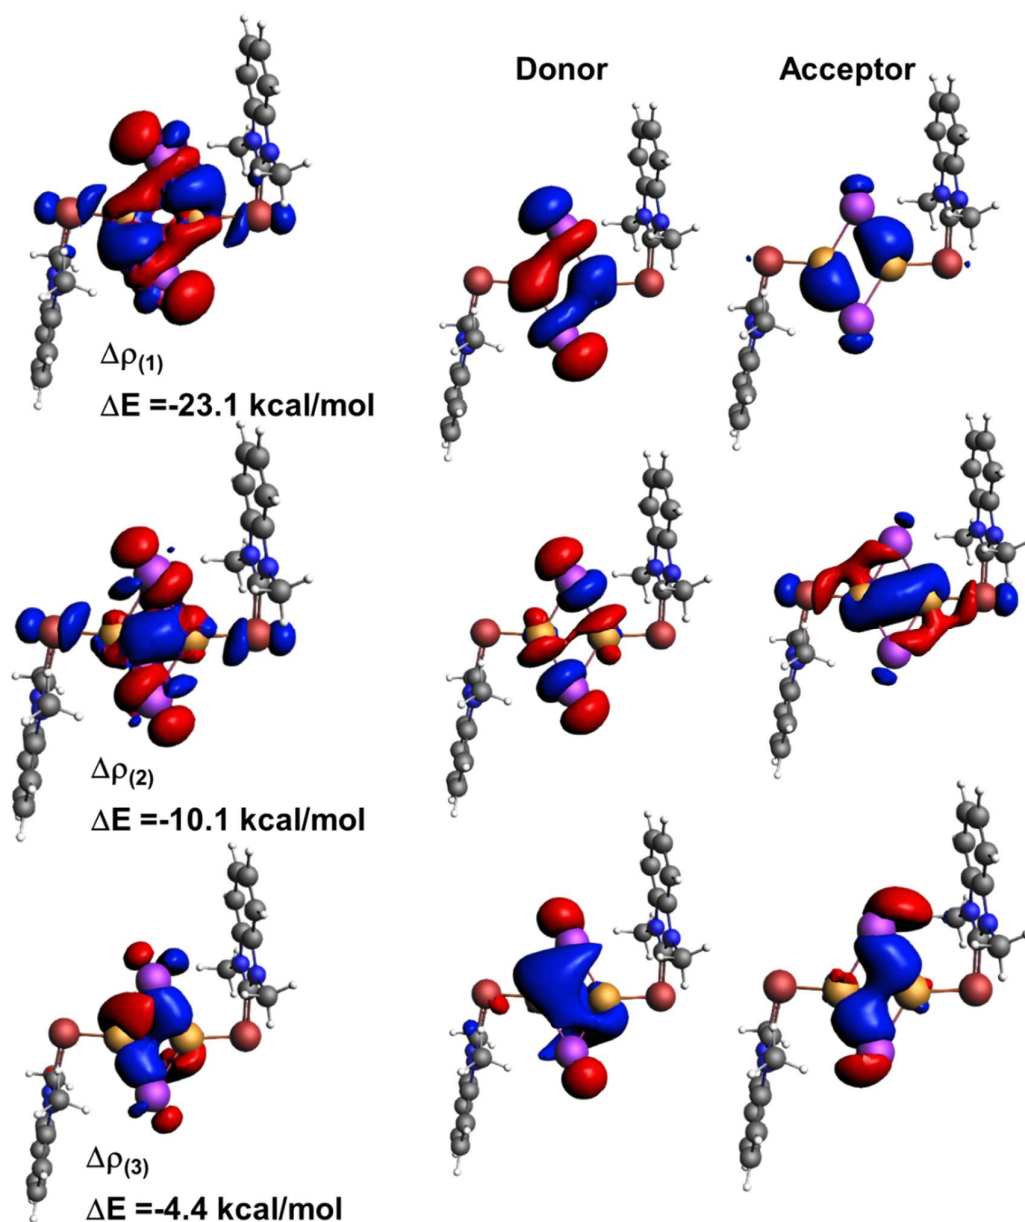

**Figure S20:** Plots of deformation densities  $\Delta\rho_n$  and the orbital stabilization energies  $\Delta E$  of complex **2**. The isosurface value for deformation densities is 0.0003. The direction of the deformation density plot is from red to blue.

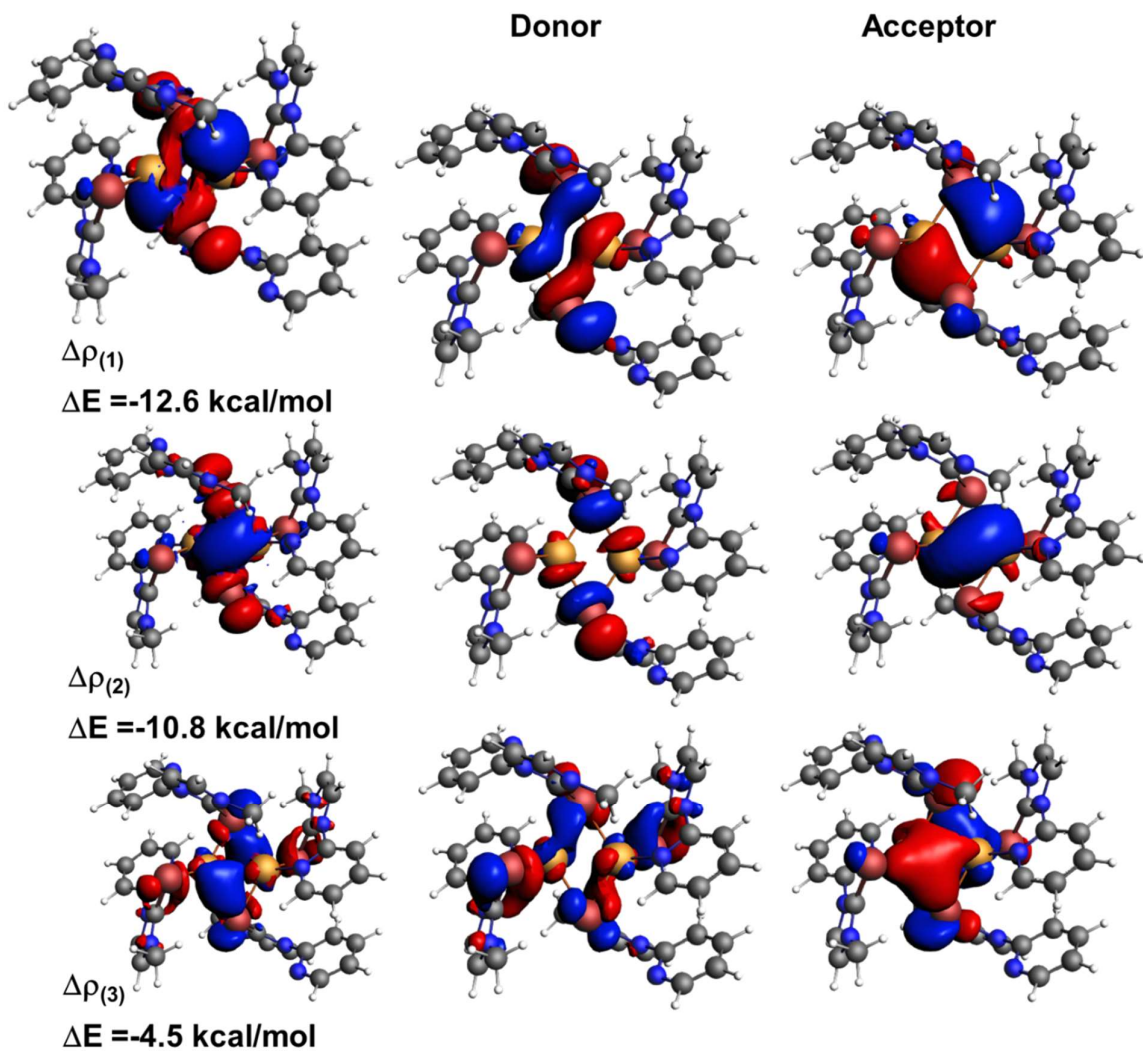

**Figure S21:** Plots of deformation densities  $\Delta\rho_n$  and the orbital stabilization energies  $\Delta E$  of complex **3**. The isosurface value for deformation densities is 0.0003. The direction of the deformation density plot is from red to blue.

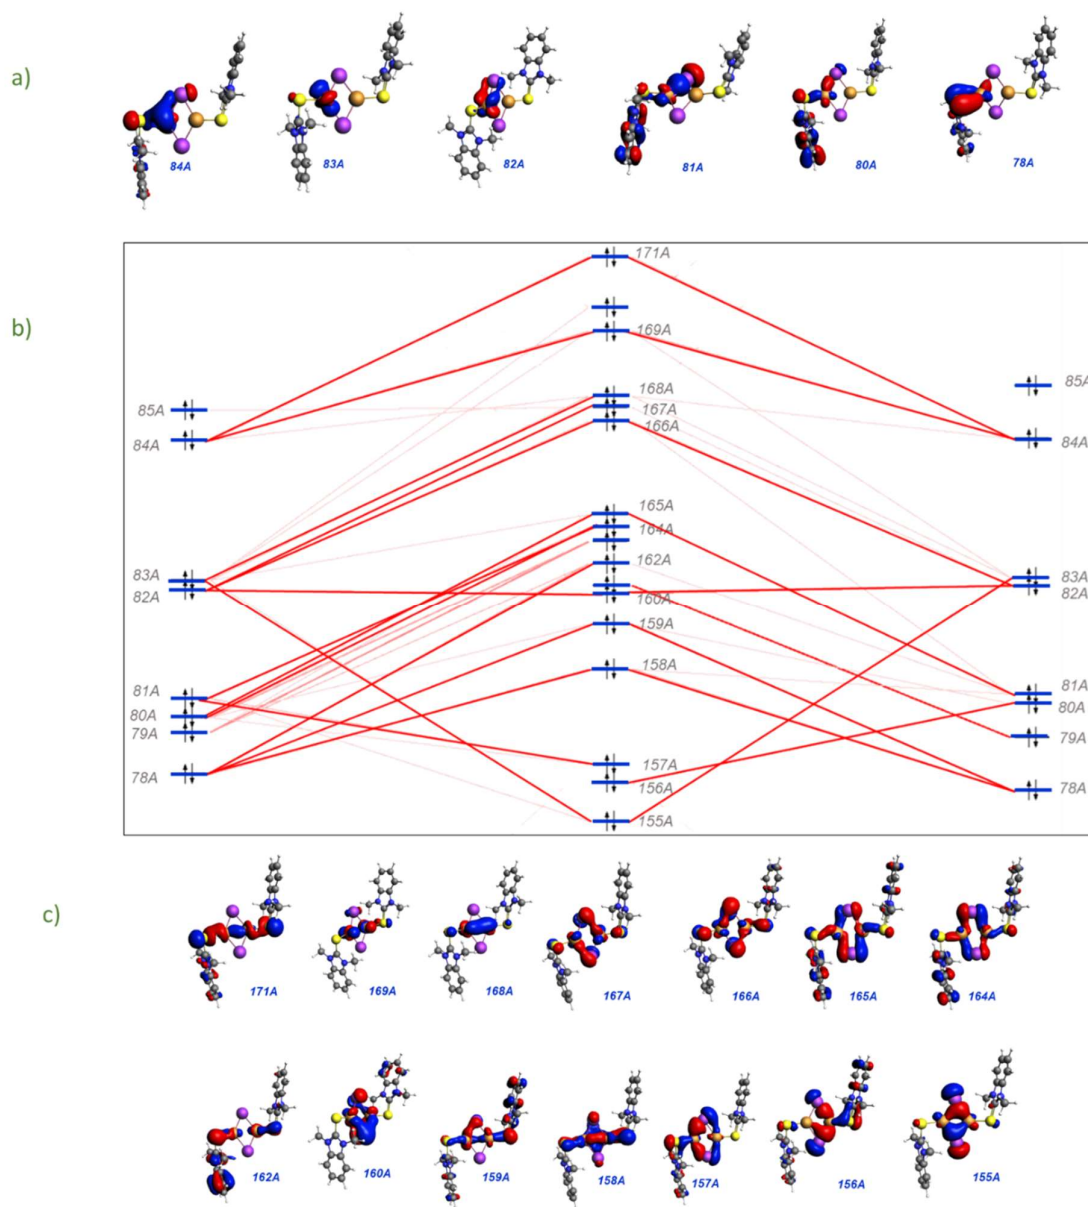

**Figure S22:** (a) Atomic orbitals corresponding to the Cu orbitals in complex **1**. (b) Molecular energy level diagram for complex **1**. (c) Molecular orbitals corresponding to the Cu-Cu interactions of Cu AO's.

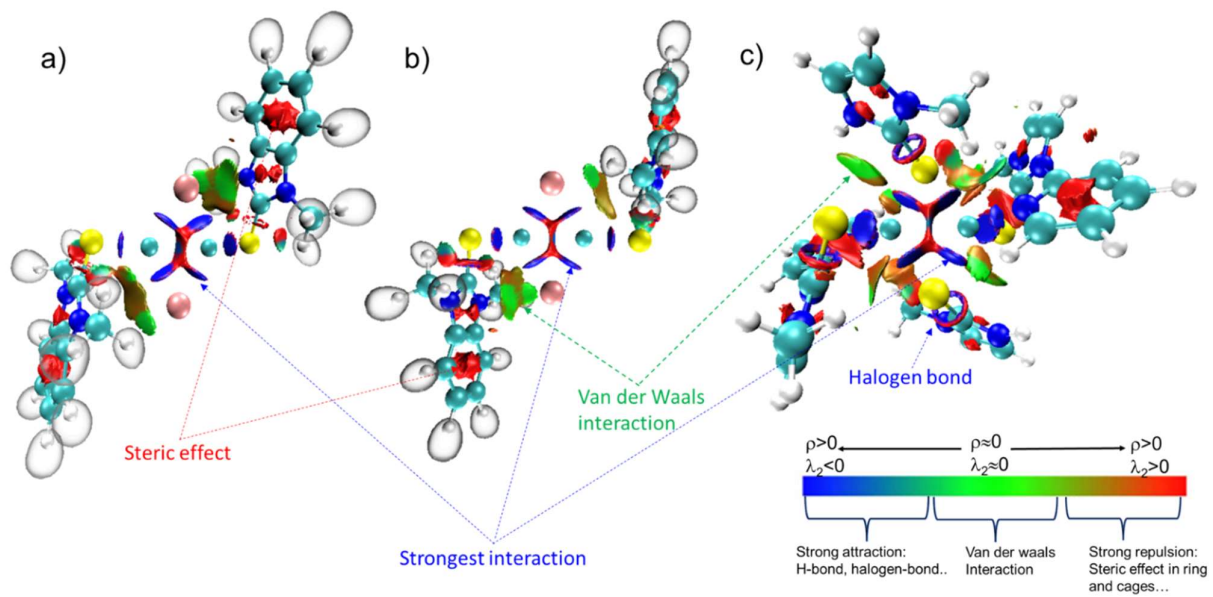

**Figure S23:** Reduced density gradient (RDG) analysis for complexes **1** (a), **2** (b), **3** (c).

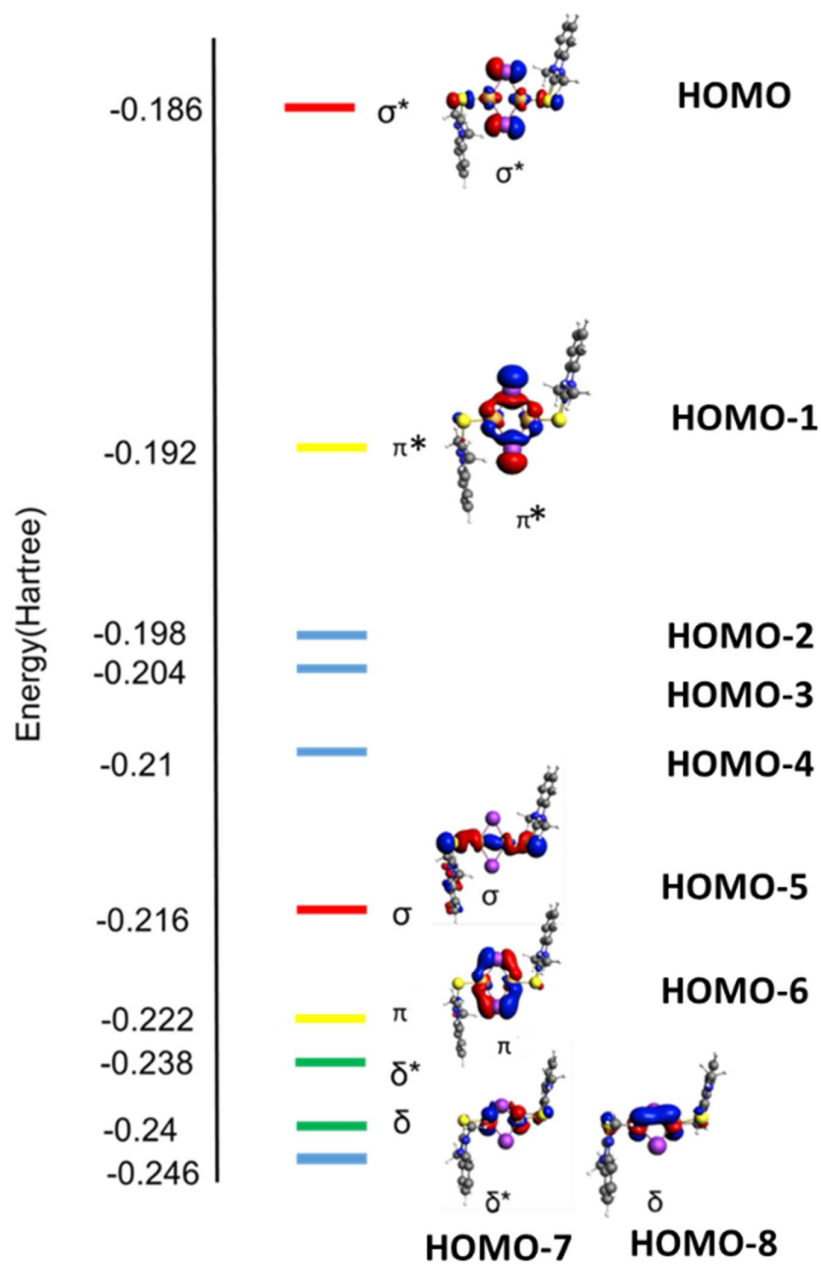

**Figure S24.** Frontier molecular orbitals of complex **1**, representing different  $\sigma$   $\pi$   $\delta$  interactions.

**Table S1.** The structural parameters of compounds **1-3**.

|                                             | <b>1</b>                                                                                     | <b>2</b>                                                                                      | <b>3</b>                                                                                                                             |
|---------------------------------------------|----------------------------------------------------------------------------------------------|-----------------------------------------------------------------------------------------------|--------------------------------------------------------------------------------------------------------------------------------------|
| Empirical Formula                           | C <sub>50</sub> H <sub>44</sub> Cu <sub>2</sub> I <sub>2</sub> N <sub>4</sub> S <sub>2</sub> | C <sub>50</sub> H <sub>44</sub> Cu <sub>2</sub> I <sub>2</sub> N <sub>4</sub> Se <sub>2</sub> | C <sub>46</sub> H <sub>54</sub> Cl <sub>6</sub> Cu <sub>1.98</sub> F <sub>12</sub> N <sub>12</sub> P <sub>2</sub> Se <sub>3.99</sub> |
| Formula Weight                              | 1145.89                                                                                      | 1239.69                                                                                       | 1718.51                                                                                                                              |
| Temperature/K                               | 298.0                                                                                        | 298.0                                                                                         | 298                                                                                                                                  |
| Crystal System                              | triclinic                                                                                    | triclinic                                                                                     | monoclinic                                                                                                                           |
| Space Group                                 | P-1                                                                                          | P-1                                                                                           | P2 <sub>1</sub> /n                                                                                                                   |
| a/Å                                         | 10.4449(3)                                                                                   | 10.4551(17)                                                                                   | 11.441(6)                                                                                                                            |
| b/Å                                         | 11.2293(3)                                                                                   | 11.2312(17)                                                                                   | 10.490(6)                                                                                                                            |
| c/Å                                         | 21.4005(6)                                                                                   | 21.572(3)                                                                                     | 27.824(15)                                                                                                                           |
| α/°                                         | 93.5040(10)                                                                                  | 93.703(5)                                                                                     | 90                                                                                                                                   |
| β/°                                         | 94.2160(10)                                                                                  | 93.917(5)                                                                                     | 101.830(17)                                                                                                                          |
| γ/°                                         | 111.4220(10)                                                                                 | 111.497(5)                                                                                    | 90                                                                                                                                   |
| Volume/Å <sup>3</sup>                       | 2319.83(11)                                                                                  | 2340.3(6)                                                                                     | 3268(3)                                                                                                                              |
| Z                                           | 2                                                                                            | 2                                                                                             | 2                                                                                                                                    |
| ρ <sub>calc</sub> /g <sup>3</sup>           | 1.640                                                                                        | 1.759                                                                                         | 1.746                                                                                                                                |
| μ/mm <sup>-1</sup>                          | 2.376                                                                                        | 3.822                                                                                         | 3.238                                                                                                                                |
| F(000)                                      | 1136.0                                                                                       | 1208.0                                                                                        | 1694.0                                                                                                                               |
| Crystal size/mm <sup>3</sup>                | 0.2 × 0.03 × 0.02                                                                            | 0.35 × 0.3 × 0.27                                                                             | 0.09 × 0.09 × 0.09                                                                                                                   |
| Radiation                                   | MoKα (λ = 0.71073)                                                                           | MoKα (λ = 0.71073)                                                                            | MoKα (λ = 0.71073)                                                                                                                   |
| 2Θ range for data collection/°              | 3.834 to 54.268                                                                              | 3.916 to 54.27                                                                                | 4.162 to 54.366                                                                                                                      |
| Index ranges                                | -13 ≤ h ≤ 13, -14 ≤ k ≤ 14, -27 ≤ l ≤ 27                                                     | -13 ≤ h ≤ 13, -14 ≤ k ≤ 14, -27 ≤ l ≤ 27                                                      | -14 ≤ h ≤ 14, -13 ≤ k ≤ 13, -34 ≤ l ≤ 35                                                                                             |
| Reflections collected                       | 47194                                                                                        | 53681                                                                                         | 28414                                                                                                                                |
| Independent reflections                     | 10254 [R <sub>int</sub> = 0.0343, R <sub>sigma</sub> = 0.0284]                               | 10311 [R <sub>int</sub> = 0.0416, R <sub>sigma</sub> = 0.0299]                                | 7229 [R <sub>int</sub> = 0.0689, R <sub>sigma</sub> = 0.0695]                                                                        |
| Data/restraints/parameters                  | 10254/0/546                                                                                  | 10311/0/546                                                                                   | 7229/0/384                                                                                                                           |
| Goodness-of-fit on F <sup>2</sup>           | 1.020                                                                                        | 1.037                                                                                         | 1.032                                                                                                                                |
| Final R indexes [I ≥ 2σ (I)]                | R <sub>1</sub> = 0.0291, wR <sub>2</sub> = 0.0623                                            | R <sub>1</sub> = 0.0298, wR <sub>2</sub> = 0.0675                                             | R <sub>1</sub> = 0.0588, wR <sub>2</sub> = 0.1510                                                                                    |
| Final R indexes [all data]                  | R <sub>1</sub> = 0.0453, wR <sub>2</sub> = 0.0677                                            | R <sub>1</sub> = 0.0360, wR <sub>2</sub> = 0.0707                                             | R <sub>1</sub> = 0.1032, wR <sub>2</sub> = 0.1733                                                                                    |
| Largest diff. peak/hole / e Å <sup>-3</sup> | 0.61/-0.63                                                                                   | 0.91/-0.83                                                                                    | 0.91/-0.82                                                                                                                           |

**Table S2.** Selected bond lengths of **1-3** (Å)

|         | <b>1</b>  | <b>2</b>  | <b>3</b>                               |            |
|---------|-----------|-----------|----------------------------------------|------------|
| Cu1-E1  | 2.2205(8) | 2.3437(6) | Se <sup>(1)</sup> - Cu <sup>(1)</sup>  | 2.4294(14) |
| Cu1-I1  | 2.5475(4) | 2.5986(6) | Cu <sup>(1)</sup> - Cu <sup>(1)1</sup> | 2.5231(18) |
| Cu1-Cu2 | 2.5911(5) | 2.5767(7) | Se <sup>(1)</sup> - C <sup>(6)</sup>   | 1.862(5)   |
| Cu1-E2  | 2.2367(8) |           | Cu <sup>(1)</sup> - N <sup>(1)</sup>   | 2.082(5)   |
| Cu2-I2  | 2.5439(4) | 2.5689(5) | Cu <sup>(1)</sup> - Se <sup>(2)</sup>  | 2.5522(14) |
|         |           |           | Cu <sup>(1)</sup> - Se <sup>(2)1</sup> | 2.4175(14) |
|         |           |           | Se <sup>(1)</sup> - Cu <sup>(1)</sup>  | 2.4294(14) |

**Table S3.** Selected bond angles of **1-3** [°]

|            | <b>1</b>   | <b>2</b>   | <b>3</b>                                                    |            |
|------------|------------|------------|-------------------------------------------------------------|------------|
| E1-Cu1-I1  | 118.88(2)  | 117.99(2)  | C <sup>(6)</sup> - Se <sup>(1)</sup> - Cu <sup>(1)</sup>    | 86.62(17)  |
| E2-Cu2-I1  | 117.88(2)  | 117.97(2)  | Se <sup>(1)</sup> - Cu <sup>(1)</sup> - Cu <sup>(1)1</sup>  | 123.18(5)  |
| C1-E1-Cu1  | 102.92(9)  | 92.26(9)   | Se <sup>(1)</sup> - Cu <sup>(1)</sup> - Se <sup>(2)</sup>   | 96.88(4)   |
| N1-C1-E1   | 125.49(18) | 126.7(2)   | Cu <sup>(1)1</sup> - Cu <sup>(1)</sup> - Se <sup>(2)</sup>  | 56.89(4)   |
| E1-Cu1-Cu2 | 167.02(3)  | 170.71(2)  | N <sup>(1)</sup> - Cu <sup>(1)</sup> - Se <sup>(1)</sup>    | 94.71(13)  |
| Cu1-I1-Cu2 | 58.705(12) | 59.995(16) | N <sup>(1)</sup> - Cu <sup>(1)</sup> - Cu <sup>(1)1</sup>   | 141.00(14) |
|            |            |            | N <sup>(1)</sup> - Cu <sup>(1)</sup> - Se <sup>(2)1</sup>   | 111.74(14) |
|            |            |            | N <sup>(1)</sup> - Cu <sup>(1)</sup> - Se <sup>(2)</sup>    | 114.67(14) |
|            |            |            | Se <sup>(2)1</sup> - Cu <sup>(1)</sup> - Se <sup>(1)</sup>  | 116.40(4)  |
|            |            |            | Se <sup>(2)1</sup> - Cu <sup>(1)</sup> - Cu <sup>(1)1</sup> | 62.16(3)   |
|            |            |            | Se <sup>(2)1</sup> - Cu <sup>(1)</sup> - Se <sup>(2)</sup>  | 119.05(5)  |

**Table S4.** Photophysical properties of **1-3**.

| Compound | $\lambda_{\text{abs}}$ , nm      | $\lambda_{\text{ex}}$ , nm<br>(solution) | $\lambda_{\text{em}}$ , nm<br>(solution) | $\lambda_{\text{ex}}$ , nm<br>(solid) | $\lambda_{\text{em}}$ , nm<br>(solid) |
|----------|----------------------------------|------------------------------------------|------------------------------------------|---------------------------------------|---------------------------------------|
| <b>1</b> | 249 and<br>327                   | 276                                      | 391, 417                                 | 200                                   | 400, 419                              |
| <b>2</b> | 253, 314,<br>352, 369<br>and 389 | 254                                      | 414, 419,<br>437                         | 204                                   | 398, 417                              |
| <b>3</b> | 319                              | 291                                      | 346, 407                                 | 319                                   | 360, 403                              |



**Table S5.** Continuous Shape Measurement (CShM) for Cu(I) sites in Cu(I)-NHCh complexes **1** and **2**

| <b>Complex</b>                   | <b>1</b>     | <b>2</b>     |
|----------------------------------|--------------|--------------|
| Metal Site<br>(ML <sub>3</sub> ) | Cu(I)        | Cu(I)        |
| <b>TP-3</b>                      | <b>0.235</b> | <b>0.107</b> |
| vT-3                             | 3.239        | 2.936        |
| fvOC-3                           | 11.275       | 10.836       |
| mvOC-3                           | 8.853        | 9.135        |

**TP-3: Trigonal (D3h)**  
 vT-3: Vacant tetrahedron(C3v)  
 fvOC-3: fac-Trivacant octahedron (C3v)  
 mvOC-3: mer-Trivacant octahedron (C2v)

**Table S6.** Continuous Shape Measurement (CShM) for Cu(I) sites in Cu(I)-NHCh complex **3**

| <b>Complex</b>                   | <b>3</b>     |
|----------------------------------|--------------|
| Metal Site<br>(ML <sub>4</sub> ) | Cu(I)        |
| SP-4                             | 28.146       |
| <b>T-4</b>                       | <b>1.682</b> |
| SS-4                             | 8.126        |
| vTBPY-4                          | 2.983        |

SP-4: Square (D4h)  
**T-4: Tetrahedron(Td)**  
 SS-4: Seesaw(C2v)  
 vTBPY-4: Vacant trigonal  
 bipyramid(C3v)
